# Supplementary material
Source: PubMed Central journal article supplement (PMC5648861)
Supplement: JB.00342-17_zjb022174570s1.pdf [file JB.00342-17_zjb022174570s1.pdf]

1 **Supporting information for**

2

3 **A bacterial multi-domain NAD-independent D-lactate dehydrogenase**  
4 **utilizes FAD and Fe-S clusters as cofactors and quinone as electron**  
5 **acceptor for D-lactate oxidization**

6

7 Tianyi Jiang<sup>a,c</sup>, Xiaoting Guo<sup>a</sup>, Jinxin Yan<sup>a</sup>, Yingxin Zhang<sup>a</sup>, Yujiao Wang<sup>a</sup>, Manman  
8 Zhang<sup>a</sup>, Binbin Sheng<sup>a</sup>, Cuiqing Ma<sup>a</sup>, Ping Xu<sup>b,a</sup>, and Chao Gao<sup>a\*</sup>

9

10 <sup>a</sup>State Key Laboratory of Microbial Technology, Shandong University, Jinan 250100,  
11 People's Republic of China

12 <sup>b</sup>State Key Laboratory of Microbial Metabolism and School of Life Sciences and  
13 Biotechnology, Shanghai Jiao Tong University, Shanghai 200240, People's Republic  
14 of China

15 <sup>c</sup>School of Municipal and Environmental Engineering, Shandong Jianzhu University,  
16 Jinan 250101, People's Republic of China

17

18 **Keywords:** NAD-independent D-lactate dehydrogenase, flavoprotein, iron-sulfur  
19 protein, electron transfer, lactate utilization, *Pseudomonas putida*

20

21 \*Address correspondence to Chao Gao, State Key Laboratory of Microbial  
22 Technology, Shandong University, Jinan 250100, People's Republic of China. Ph:  
23 (+86) 531 883 64003; Fax: (+86) 531 883 69463; E-mail: [jieerbu@sdu.edu.cn](mailto:jieerbu@sdu.edu.cn)

24

25 **Table S1.** Purification procedure of heterologous expressed Fe-S D-iLDH.

|                    | Specific activity (U/mg) | Fold purification | Yield (%) |
|--------------------|--------------------------|-------------------|-----------|
| Crude cell extract | 1.25                     | 1                 | 100       |
| His-trap           | 34.39                    | 27.61             | 75.92     |
| DEAE Sepharose FF  | 42.48                    | 34.11             | 68.21     |
| Superdex 200       | 44.51                    | 35.74             | 44.67     |

26 The activities were determined in 1 mL of 50 mM Tris-HCl (pH 7.4) with 1.0 mM

27 D-lactate as substrate and 0.2 mM MTT as electron acceptor.

28 **Table S2.** Strains and plasmids used in this work.

| Strain or plasmid                                              | Relevant characteristics <sup>a</sup>                                                                                                                          | Source or reference |
|----------------------------------------------------------------|----------------------------------------------------------------------------------------------------------------------------------------------------------------|---------------------|
| <b>Strains</b>                                                 |                                                                                                                                                                |                     |
| <i>P. putida</i> KT2440                                        | Wild-type, capable of DL-lactate utilizing                                                                                                                     | ATCC <sup>b</sup>   |
| <i>P. putida</i> KT2440 ( $\Delta lldE\Delta glcD$ )           | <i>P. putida</i> KT2440 mutant obtained by deletion of the <i>lldE</i> gene and <i>glcD</i> gene                                                               | (1)                 |
| <i>P. putida</i> KT2440 ( $\Delta lldE\Delta glcD::lldE$ )     | <i>P. putida</i> KT2440 ( $\Delta lldE\Delta glcD$ ) harboring the plasmid pBBR- <i>lldE</i>                                                                   | (1)                 |
| <i>P. putida</i> KT2440 ( $\Delta lldE\Delta glcD::lldEFAD2$ ) | <i>P. putida</i> KT2440 ( $\Delta lldE\Delta glcD$ ) harboring the plasmid pBBR- <i>lldEFAD2</i>                                                               | This study          |
| <i>E. coli</i> DH5 $\alpha$                                    | F <sup>-</sup> $\phi 80lacZ\Delta M15 \Delta(lacZYA-argF)U169 recA1 endA1 hsdR17(r_K^-, m_K^+) phoA supE44 thi-1 gyrA96 relA1 \lambda^-$ , used for gene clone | Invitrogen          |
| <i>E. coli</i> DH5 $\alpha$ (pEASY-Blunt- <i>lldEFes3</i> )    | <i>E. coli</i> DH5 $\alpha$ harboring the plasmid pEASY-Blunt- <i>lldEFes3</i>                                                                                 | This study          |
| <i>E. coli</i> C43 (DE3)                                       | Mutant of <i>E. coli</i> BL21 (DE3), used for protein expression                                                                                               | (2)                 |
| <i>E. coli</i> C43 (DE3) (pETDuet- <i>lldE</i> )               | <i>E. coli</i> C43 (DE3) harboring the plasmid pETDuet- <i>lldE</i>                                                                                            | This study          |
| <i>E. coli</i> C43 (DE3) (pETDuet- <i>lldEFAD1</i> )           | <i>E. coli</i> C43 (DE3) harboring the plasmid pETDuet- <i>lldEFAD1</i>                                                                                        | This study          |
| <i>E. coli</i> C43 (DE3) (pETDuet- <i>lldEFAD2</i> )           | <i>E. coli</i> C43 (DE3) harboring the plasmid pETDuet- <i>lldEFAD2</i>                                                                                        | This study          |
| <i>E. coli</i> C43 (DE3) (pETDuet- <i>lldEFAD3</i> )           | <i>E. coli</i> C43 (DE3) harboring the plasmid pETDuet- <i>lldEFAD3</i>                                                                                        | This study          |
| <i>E. coli</i> C43 (DE3) (pETDuet- <i>lldEFes1</i> )           | <i>E. coli</i> C43 (DE3) harboring the plasmid pETDuet- <i>lldEFes1</i>                                                                                        | This study          |
| <i>E. coli</i> C43 (DE3) (pETDuet- <i>lldEFes2</i> )           | <i>E. coli</i> C43 (DE3) harboring the plasmid pETDuet- <i>lldEFes2</i>                                                                                        | This study          |
| <i>E. coli</i> C43 (DE3) (pETDuet- <i>lldEFes3</i> )           | <i>E. coli</i> C43 (DE3) harboring the plasmid pETDuet- <i>lldEFes3</i>                                                                                        | This study          |
| <i>E. coli</i> C43 (DE3) (pETDuet- <i>lldEFes3M1</i> )         | <i>E. coli</i> C43 (DE3) harboring the plasmid pETDuet- <i>lldEFes3M1</i>                                                                                      | This study          |
| <i>E. coli</i> C43 (DE3) (pETDuet- <i>lldEFes3M2</i> )         | <i>E. coli</i> C43 (DE3) harboring the plasmid pETDuet- <i>lldEFes3M2</i>                                                                                      | This study          |
| <i>E. coli</i> C43 (DE3) (pETDuet- <i>lldEFes3M4</i> )         | <i>E. coli</i> C43 (DE3) harboring the plasmid pETDuet- <i>lldEFes3M4</i>                                                                                      | This study          |
| <i>E. coli</i> C43 (DE3) (pETDuet- <i>lldEFes3M6</i> )         | <i>E. coli</i> C43 (DE3) harboring the plasmid pETDuet- <i>lldEFes3M6</i>                                                                                      | This study          |
| <i>E. coli</i> C43 (DE3) (pETDuet- <i>lldEFes3M7</i> )         | <i>E. coli</i> C43 (DE3) harboring the plasmid pETDuet- <i>lldEFes3M7</i>                                                                                      | This study          |
| <b>Plasmids</b>                                                |                                                                                                                                                                |                     |
| pBBR1MCS-5                                                     | Plasmid for gene complementation, Gm <sup>R</sup>                                                                                                              | Biovector Science   |

|                                      |                                                                                                                                       | Lab, Inc   |
|--------------------------------------|---------------------------------------------------------------------------------------------------------------------------------------|------------|
| pBBR- <i>lldE</i>                    | The <i>lldE</i> gene that encoding Fe-S D-iLDH was inserted into pBBR1MCS-5.                                                          | This study |
| pBBR- <i>lldEFAD2</i>                | The <i>lldEFAD2</i> gene that encoding Fe-S D-iLDH 1-530 was inserted into pBBR1MCS-5.                                                | This study |
| <i>pEASY</i> -Blunt                  | Ap <sup>R</sup> , Km <sup>R</sup> , cloning vector                                                                                    | TransGen   |
| <i>pEASY</i> -Blunt- <i>lldEFes3</i> | The <i>lldEFes3</i> gene that encoding Fe-S D-iLDH 531-936 was inserted into <i>pEASY</i> -Blunt.                                     | This study |
| pETDuet-1                            | Vector for protein expression, Ap <sup>R</sup>                                                                                        | Novagen    |
| pETDuet- <i>lldE</i>                 | The <i>lldE</i> gene that encoding Fe-S D-iLDH was inserted into pETDuet-1.                                                           | This study |
| pETDuet- <i>lldEFAD1</i>             | The <i>lldEFAD1</i> gene that encoding Fe-S D-iLDH 1-519 was inserted into pETDuet-1.                                                 | This study |
| pETDuet- <i>lldEFAD2</i>             | The <i>lldEFAD2</i> gene that encoding Fe-S D-iLDH 1-530 was inserted into pETDuet-1.                                                 | This study |
| pETDuet- <i>lldEFAD3</i>             | The <i>lldEFAD3</i> gene that encoding Fe-S D-iLDH 1-538 was inserted into pETDuet-1.                                                 | This study |
| pETDuet- <i>lldEFes1</i>             | The <i>lldEFes1</i> gene that encoding Fe-S D-iLDH 511-936 was inserted into pETDuet-1.                                               | This study |
| pETDuet- <i>lldEFes2</i>             | The <i>lldEFes2</i> gene that encoding Fe-S D-iLDH 520-936 was inserted into pETDuet-1.                                               | This study |
| pETDuet- <i>lldEFes3</i>             | The <i>lldEFes3</i> gene that encoding Fe-S D-iLDH 531-936 was inserted into pETDuet-1.                                               | This study |
| pETDuet- <i>lldEFes3M1</i>           | The <i>lldEFes3M1</i> gene that encoding Fe-S D-iLDH 531-936 (C540S) was inserted into pETDuet-1.                                     | This study |
| pETDuet- <i>lldEFes3M2</i>           | The <i>lldEFes3M2</i> gene that encoding Fe-S D-iLDH 531-936 (C540S/C594S) was inserted into pETDuet-1.                               | This study |
| pETDuet- <i>lldEFes3M4</i>           | The <i>lldEFes3M4</i> gene that encoding Fe-S D-iLDH 531-936 (C540S/C594S/C751S/C752S) was inserted into pETDuet-1.                   | This study |
| pETDuet- <i>lldEFes3M6</i>           | The <i>lldEFes3M6</i> gene that encoding Fe-S D-iLDH 531-936 (C540S/C594S/C751S/C752S/C540S/C594S) was inserted into pETDuet-1.       | This study |
| pETDuet- <i>lldEFes3M7</i>           | The <i>lldEFes3M7</i> gene that encoding Fe-S D-iLDH 531-936 (C540S/C543S/C594S/C751S/C752S/C540S/C594S) was inserted into pETDuet-1. | This study |

29 <sup>a</sup> Km<sup>R</sup>, kanamycin resistant; Ap<sup>R</sup>, ampicillin resistant; Gm<sup>R</sup>, gentamicin resistant.

30 <sup>b</sup> ATCC, American Type Culture Collection.

31 **Tanle S3.** Oligonucleotides used in this study.

| Primer                           | Sequence(5'-3') <sup>a</sup>             | Use                                                                                                                                                                                                                          |
|----------------------------------|------------------------------------------|------------------------------------------------------------------------------------------------------------------------------------------------------------------------------------------------------------------------------|
| <b>Complementation</b>           |                                          |                                                                                                                                                                                                                              |
| <i>lldE</i> -pBBR-F              | TGGATCCATGAGCCTGCCCCGCCGCGTT (BamHI)     | Amplification of fragment <i>lldE</i> for constructing pBBR- <i>lldEFAD2</i> (forward)                                                                                                                                       |
| <i>lldEFAD2</i> -pBBR-R          | TCTCGAGTTACAGCGGCTTGAGGTTTT (XhoI)       | Amplification of fragment <i>lldE</i> for constructing pBBR- <i>lldEFAD2</i> (reverse)                                                                                                                                       |
| <b>Overexpression</b>            |                                          |                                                                                                                                                                                                                              |
| <i>lldE</i> -F                   | TGAATTCATGAGCCTGCCCCGCCGCGTT (HindIII)   | Amplification of <i>lldE</i> , <i>lldEFAD1</i> , <i>lldEFAD2</i> or <i>lldEFAD3</i> for constructing pETDuet- <i>lldE</i> , pETDuet- <i>lldEFAD1</i> , pETDuet- <i>lldEFAD2</i> or pETDuet- <i>lldEFAD3</i> (forward)        |
| <i>lldE</i> -R                   | ACTCGAGTTAGAGGCTGCGTGGCCGGG (XhoI)       | Amplification of <i>lldE</i> , <i>lldEFes1</i> , <i>lldEFes2</i> or <i>lldEFes3</i> for <i>constructing</i> pETDuet- <i>lldE</i> , pETDuet- <i>lldEFes1</i> , pETDuet- <i>lldEFes2</i> or pETDuet- <i>lldEFes3</i> (reverse) |
| <i>lldEFAD1</i> -R               | CGCTCGAGTTAGTCTTCGCTCAACACCACGT (XhoI)   | Amplification of <i>lldEFAD1</i> for constructing pETDuet- <i>lldEFAD1</i> (reverse)                                                                                                                                         |
| <i>lldEFAD2</i> -R               | CGCTCGAGTTACAGCGGCTTGAGGTTTTTCA (XhoI)   | Amplification of <i>lldEFAD2</i> for constructing pETDuet- <i>lldEFAD2</i> (reverse)                                                                                                                                         |
| <i>lldEFAD3</i> -R               | TTCTCGAGTTAGTCGACGATTTTGTCGGCGG (XhoI)   | Amplification of <i>lldEFAD3</i> for constructing pETDuet- <i>lldEFAD3</i> (reverse)                                                                                                                                         |
| <i>lldEFes1</i> -F               | AGAATTCGATGAACCCCGACGTGGTGTGAGC (EcoRI)  | Amplification of <i>lldEFes1</i> for constructing pETDuet- <i>lldEFes1</i> (forward)                                                                                                                                         |
| <i>lldEFes2</i> -F               | AGAATTCGATGCCGGATATCCACCTGAAAAAC (EcoRI) | Amplification of <i>lldEFes2</i> for constructing pETDuet- <i>lldEFes2</i> (forward)                                                                                                                                         |
| <i>lldEFes3</i> -F               | AGAATTCGATGAACCCCGACGTGGTGTGAGC (EcoRI)  | Amplification of <i>lldEFes3</i> for constructing pETDuet- <i>lldEFes3</i> (forward)                                                                                                                                         |
| <b>Site-directed mutagenesis</b> |                                          |                                                                                                                                                                                                                              |
| C540S-F                          | CAAGTCCATCGAGTGCGGCT                     | Amplification of <i>pEASY-Blunt-lldEFes3</i> for introducing C540S variation in                                                                                                                                              |

|              |                            |                                                                                                                               |
|--------------|----------------------------|-------------------------------------------------------------------------------------------------------------------------------|
| C540S-R      | TCGACGATTTTGTCTGGCGGC      | Fe-S oxidoreductase domain (forward)                                                                                          |
|              |                            | Amplification of <i>pEASY-Blunt-ldEFeS3</i> for introducing C540S variation in Fe-S oxidoreductase domain (reverse)           |
| C540SC543S-F | GACAAGTCCATCGAGTCCGGC      | Amplification of <i>pEASY-Blunt-ldEFeS3</i> for introducing C540S and C543S variation in Fe-S oxidoreductase domain (forward) |
| C540SC543S-R | GACGATTTTGTCTGGCGGCAG      | Amplification of <i>pEASY-Blunt-ldEFeS3</i> for introducing C540S and C543S variation in Fe-S oxidoreductase domain (reverse) |
| C594S-F      | ACACCTCCGCCGCTACCGGCCT     | Amplification of <i>pEASY-Blunt-ldEFeS3</i> for introducing C594S variation in Fe-S oxidoreductase domain (forward)           |
| C594S-R      | CGATGCCCTGGTACTGGTAGCTTTGC | Amplification of <i>pEASY-Blunt-ldEFeS3</i> for introducing C594S variation in Fe-S oxidoreductase domain (reverse)           |
| C751SC752S-F | CGACAGCCTGTCTCCGGCCA       | Amplification of <i>pEASY-Blunt-ldEFeS3</i> for introducing C751S and C752S variation in Fe-S oxidoreductase domain (forward) |
| C751SC752S-R | GCGTTGTCGGGGAACACCACC      | Amplification of <i>pEASY-Blunt-ldEFeS3</i> for introducing C751S and C752S variation in Fe-S oxidoreductase domain (reverse) |
| C869SC870S-F | GTATTCATTCTCCGGGTTT        | Amplification of <i>pEASY-Blunt-ldEFeS3</i> for introducing C869S and C870S variation in Fe-S oxidoreductase domain (forward) |
| C869SC870S-R | CTTCCGGGATCACACCTGT        | Amplification of <i>pEASY-Blunt-ldEFeS3</i> for introducing C869S and C870S variation in Fe-S oxidoreductase domain (reverse) |

---

32 <sup>a</sup> Restriction sites are underlined, and the restriction enzymes are indicated in parentheses.

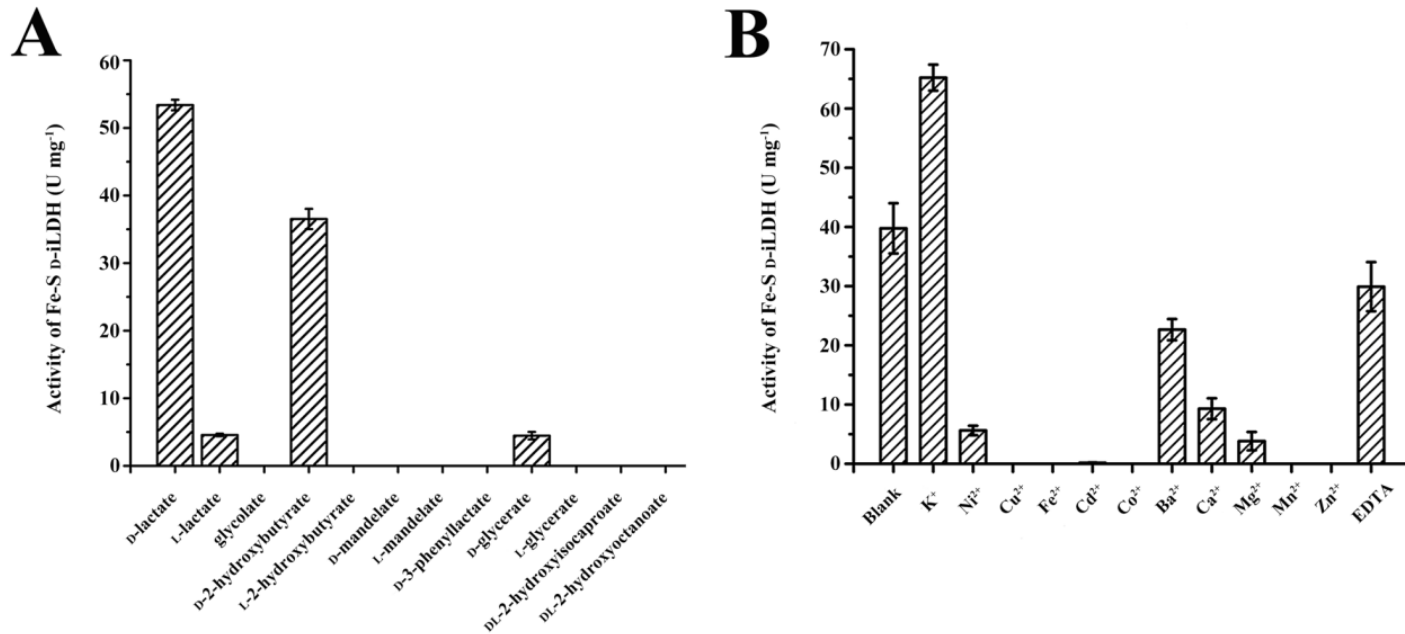

33

34 **Figure S1.** Characterization of Fe-S D-iLDH from *P. putida* KT2440. (A) Substrate specificity of the purified enzyme. (B) The effect of metal

35 ions on activity of the purified enzyme. Values are the mean  $\pm$  SD of three parallel replicates for each panel.

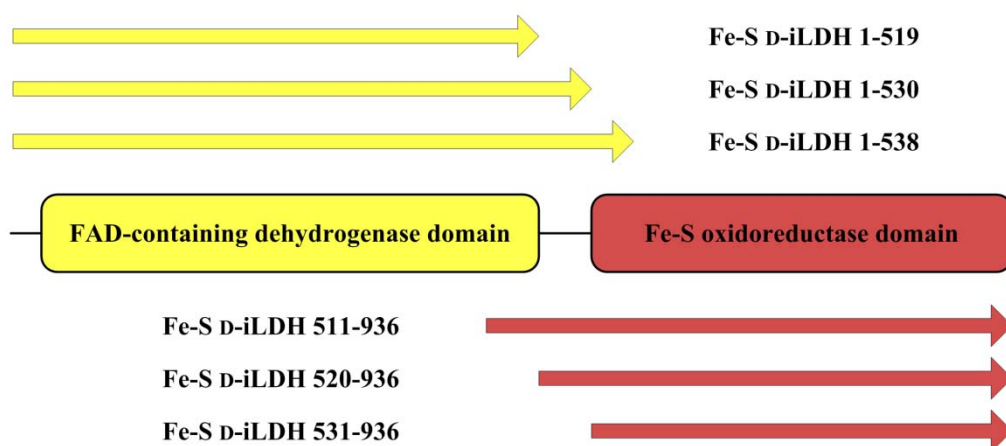

36  
 37 **Figure S2.** Scheme of expression procedure of FAD-containing dehydrogenase domain and  
 38 Fe-S oxidoreductase domain. For the expression of FAD-containing dehydrogenase domain,  
 39 three regions were cloned with different 3'-terminuses. The resulting genes *lldEFAD1*,  
 40 *lldEFAD2* and *lldEFAD3* encode proteins Fe-S D-iLDH 1-519, Fe-S D-iLDH 1-530 and Fe-S  
 41 D-iLDH 1-538, respectively. Fe-S D-iLDH 1-519 keeps the integral N-terminus and the  
 42 predicted FAD-containing dehydrogenase domain without additional residues at the  
 43 C-terminus. The hinge area was added in Fe-S D-iLDH 1-530, and 8 amino acids of the  
 44 N-terminus sequence of Fe-S oxidoreductase domain were further added to construct Fe-S  
 45 D-iLDH 1-538. Fe-S D-iLDH 1-530 and Fe-S D-iLDH 1-538 were soluble and have similar  
 46 specific activities, while Fe-S D-iLDH 1-519 was expressed as inclusion body. So the  
 47 following experiments were carried out using Fe-S D-iLDH 1-530 with less redundant  
 48 sequence. Similarly, for the expression of Fe-S oxidoreductase domain, three regions were  
 49 cloned with different 5'-terminuses. The resulting genes *lldEFes1*, *lldEFes2* and *lldEFes3*  
 50 encode proteins Fe-S D-iLDH 511-936, Fe-S D-iLDH 520-936 and Fe-S D-iLDH 531-936  
 51 with different N-terminus. All the three purified proteins had identical absorption spectrums,



52 so Fe-S D-iLDH 531-936 that has least redundant sequence was used in following  
53 experiments.

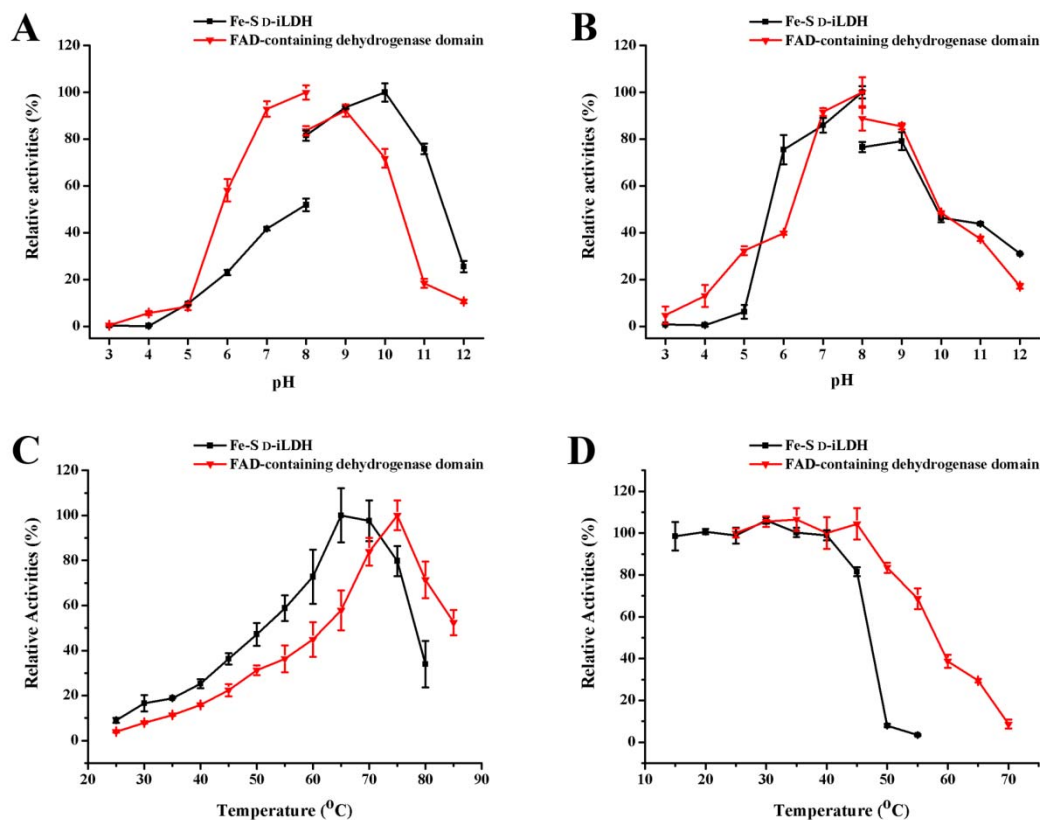

54  
 55 **Figure S3.** Enzymatic properties of Fe-S D-iLDH and FAD-containing dehydrogenase  
 56 domain. (A) Effects of pH on activities of Fe-S D-iLDH and FAD-containing dehydrogenase  
 57 domain. The highest activity obtained with each enzyme was defined as 100%, respectively.  
 58 (B) The stabilities of Fe-S D-iLDH and FAD-containing dehydrogenase domain as a function  
 59 of pH. The enzymes were incubated at different pH for 30 min and then assayed. The activity  
 60 of each enzyme without pH treatment (stored in 100 mM sodium phosphate buffer, pH 7.4)  
 61 was defined as 100%, respectively. (C) Effects of temperature on activities of Fe-S D-iLDH  
 62 and FAD-containing dehydrogenase domain. The highest activity obtained with each enzyme  
 63 was defined as 100%, respectively. (D) The stability of Fe-S D-iLDH and FAD-containing  
 64 dehydrogenase domain as a function of temperature. The enzymes were incubated at different  
 65 temperature for 30 min and then assayed. The enzyme activity without treatment (store at 4°C)

66 was defined as 100%. The activities were determined in 1 mL of 50 mM Tris-HCl (pH 7.4)  
67 with 1.0 mM D-lactate as substrate and 0.2 mM MTT as electron acceptor. For (A) and (B),  
68 the buffers used were: 0.2 M Na<sub>2</sub>HPO<sub>4</sub>-0.1 M citric acid buffer for pH 3.0-8.0; 50 mM  
69 Glycine-NaOH buffer for pH 8.0-12.0. Values are the mean ± SD of three parallel replicates  
70 for each panel.

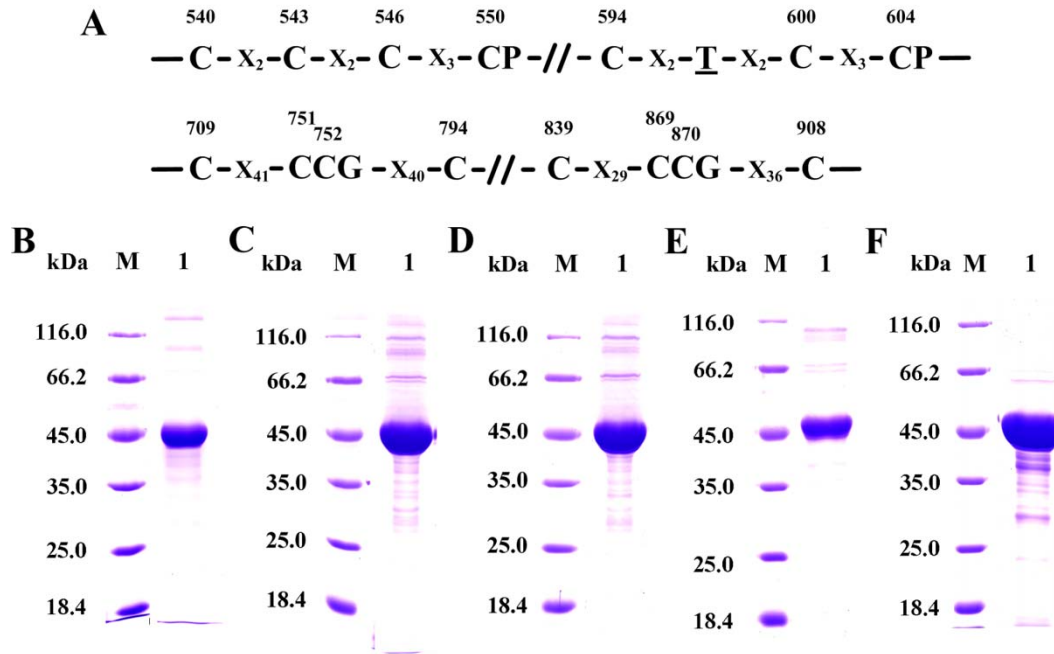

71

72 **Figure S4.** Construction of Fe-S oxidoreductase domain variants. (A) Scheme of the

73 predicted cysteines involved in Fe-S clusters binding in the sequence of Fe-S D-iLDH. (B)

74 SDS-PAGE analysis of the purified C540S Fe-S oxidoreductase domain. (C) SDS-PAGE

75 analysis of the purified C540S/C594S Fe-S oxidoreductase domain. (D) SDS-PAGE analysis

76 of the purified C540S/C594S/C751S/C752S Fe-S oxidoreductase domain. (E) SDS-PAGE

77 analysis of the purified C540S/C594S/C751S/C752S/C540S/C594S Fe-S oxidoreductase

78 domain. (F) SDS-PAGE analysis of the purified

79 C540S/C543S/C594S/C751S/C752S/C540S/C594S Fe-S oxidoreductase domain.

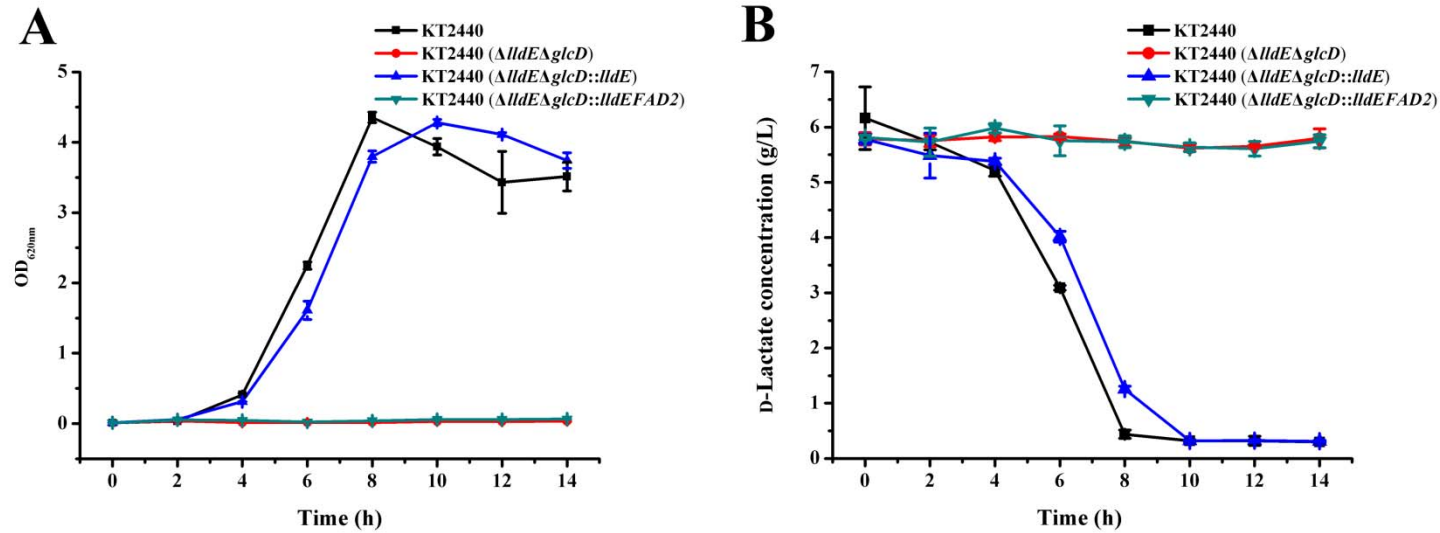

80

81 **Figure S5.** Time-course study of *P. putida* KT2440 and its derivatives growths with D-lactate as the sole carbon source. (A) Growth curves of *P.*

82 *putida* KT2440 and its derivatives in minimal medium supplemented with 6 g·L<sup>-1</sup> D-lactate as the sole carbon source. (B) D-Lactate

83 concentrations measured during the growths of *P. putida* KT2440 and its derivatives. Results are means ± SD of three parallel replicates.

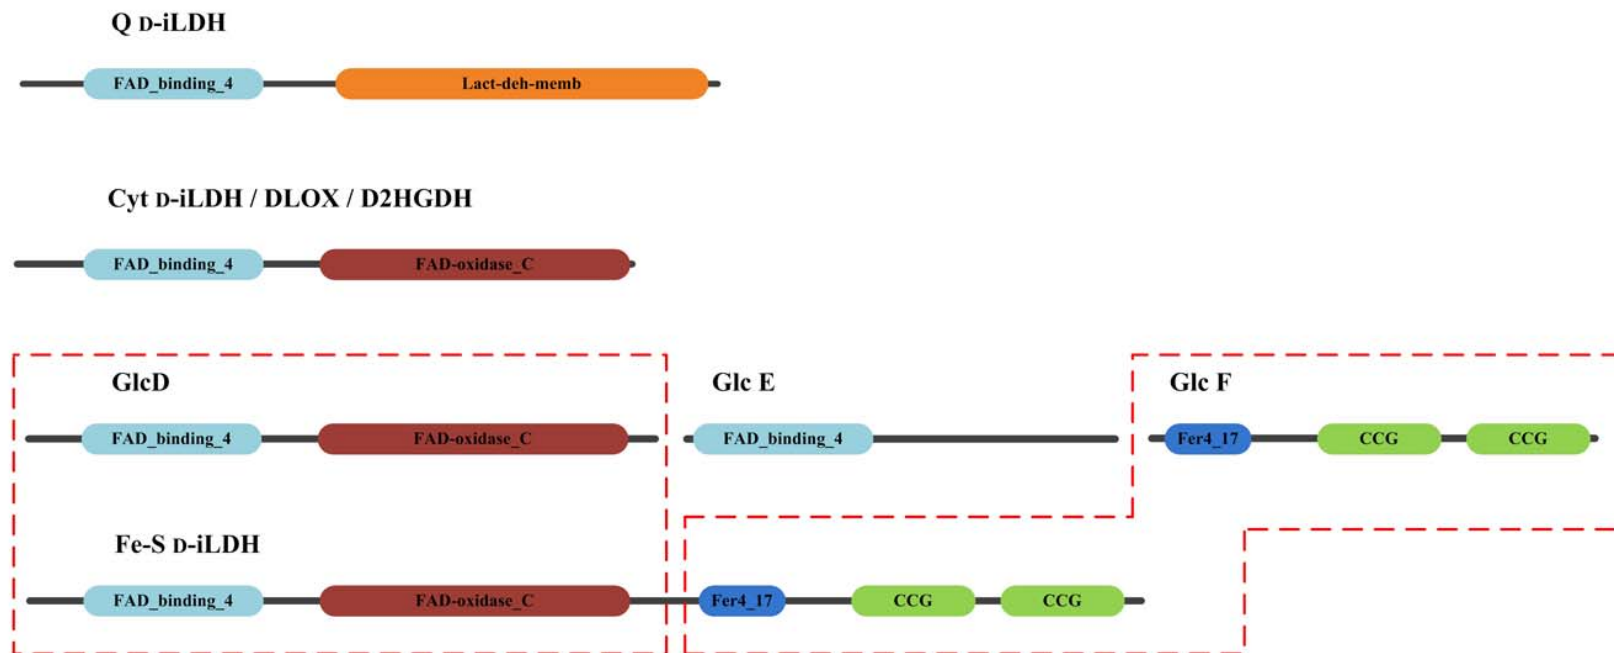

84

85 **Figure S6.** Sequence features of D-iLDHs and other related FAD-binding-4 family proteins. The analysis is based on the Pfam (protein family)

86 database. The names of domains in the Pfam database are given. Detailed descriptions of the domains can be found in the Pfam database ([http://](http://pfam.sanger.ac.uk/)

87 [pfam.sanger.ac.uk/](http://pfam.sanger.ac.uk/)). The dotted boxes indicate the similar domain organization of Fe-S D-iLDH and the GlcD, GlcF subunits of glycolate

88 dehydrogenase.

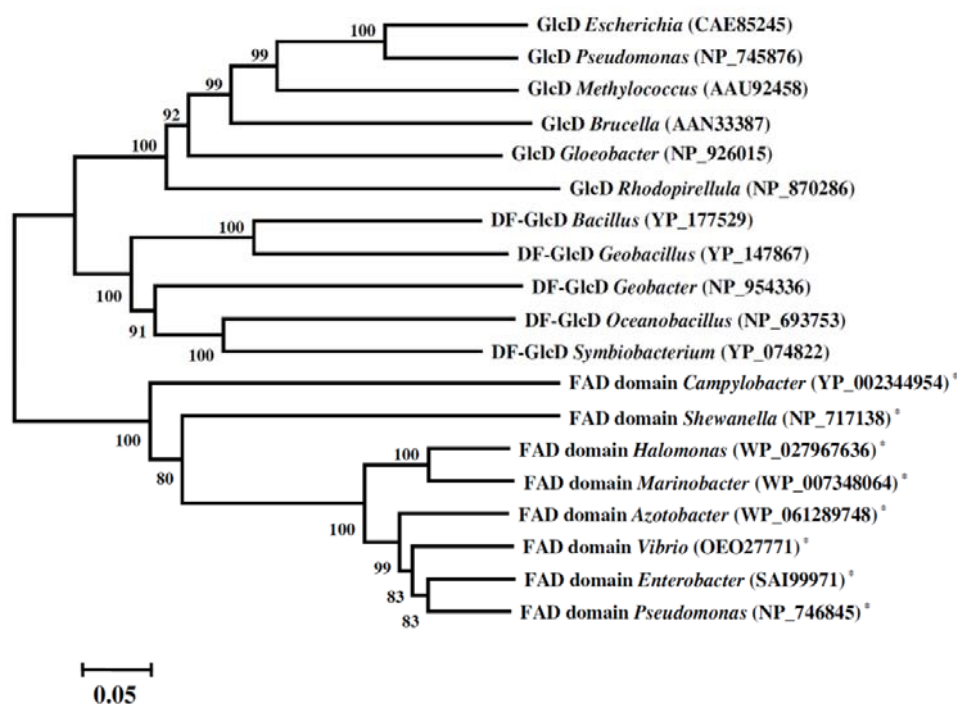

89  
 90 **Figuer S7.** Evolutionary relationships of GlcD proteins and predicted FAD-containing  
 91 dehydrogenase domains of Fe-S D-iLDHs. The phylogenetic tree was constructed using  
 92 neighbor-joining method with Mega 5 software. Bootstrap values (%) are for 500 replicates.  
 93 The scale at the bottom indicates sequence divergence. The accession numbers (from the  
 94 National Center for Biotechnology Information, NCBI) are given in parentheses. Asterisks  
 95 indicate the protein sequences analyzed are not full length of the sequences with the given  
 96 accession numbers, but only the predicted FAD-containing dehydrogenase domains of them.

97  
 98 **REFERENCES**

99 1. Zhang Y, Jiang T, Sheng B, Long Y, Gao C, Ma C, Xu P. 2016. Coexistence of two  
 100 D-lactate-utilizing systems in *Pseudomonas putida* KT2440. *Environ. Microbiol. Rep.*  
 101 8:699–707

- 102 2. Miroux B, Walker JE. 1996. Over-production of proteins in *Escherichia coli*: mutant  
103 hosts that allow synthesis of some membrane proteins and globular proteins at high  
104 levels. *J. Mol. Biol.* 260:289–298.

105
